# Supplementary material
Source: PubMed Central journal article supplement (PMC2659218)
Supplement: M806927200_2.pdf [file M806927200_2.pdf]

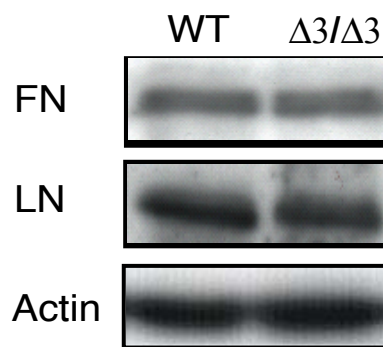

**Supplemental Fig. 2.** Immunoblot for fibronectin and laminin 1. Immunoblot analysis was performed using cell lysate samples containing the extracellular matrix component from wild type and *Cspg2*  $\Delta 3/\Delta 3$  fibroblasts cultured for 72 h. Note similar expression levels of fibronectin (FN) and laminin 1 (LN) between the two genotypes.
